# Supplementary material for: Introduction of a Microsoft Excel-based unified electronic weekend handover document in Acute and General Medicine in a DGH: aims, outcomes and challenges
Source: PubMed Central journal article supplement — BMJ Qual Improv Rep. 2017 Mar 16;6(1):u212152.w5721. doi: 10.1136/bmjquality.u212152.w5721 (PMC5361068; doi:10.1136/bmjquality.u212152.w5721), 2017-03-16

**Supplementary information – baseline measurements**

*Figure 2 Baseline audit data in General Medicine*

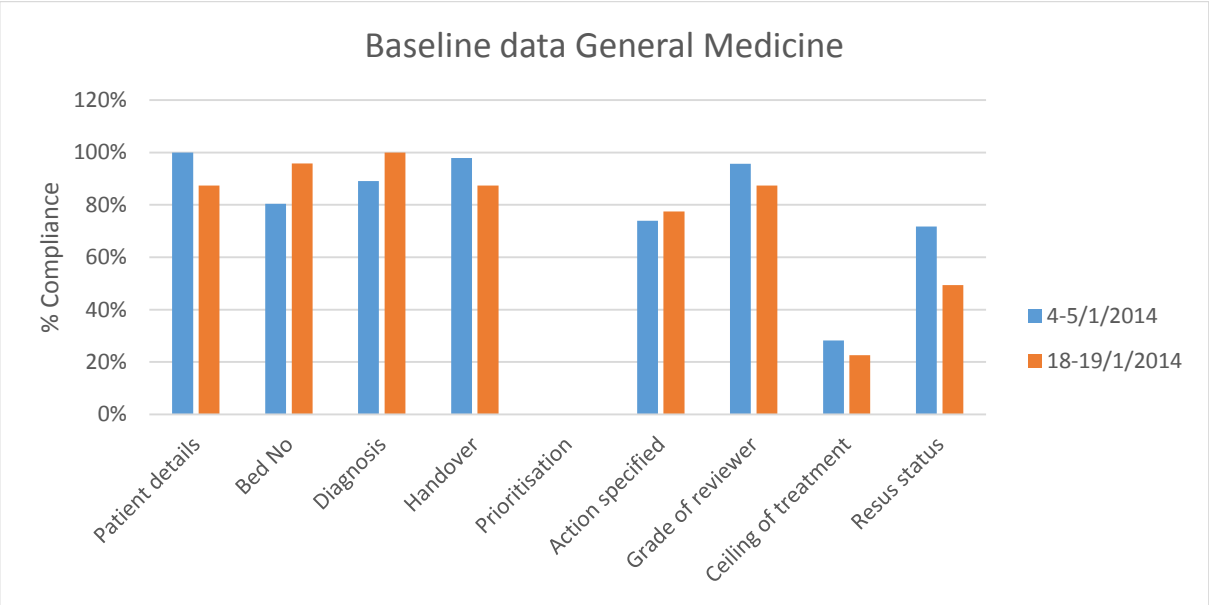

Figure 3 Baseline audit data in Acute Medicine

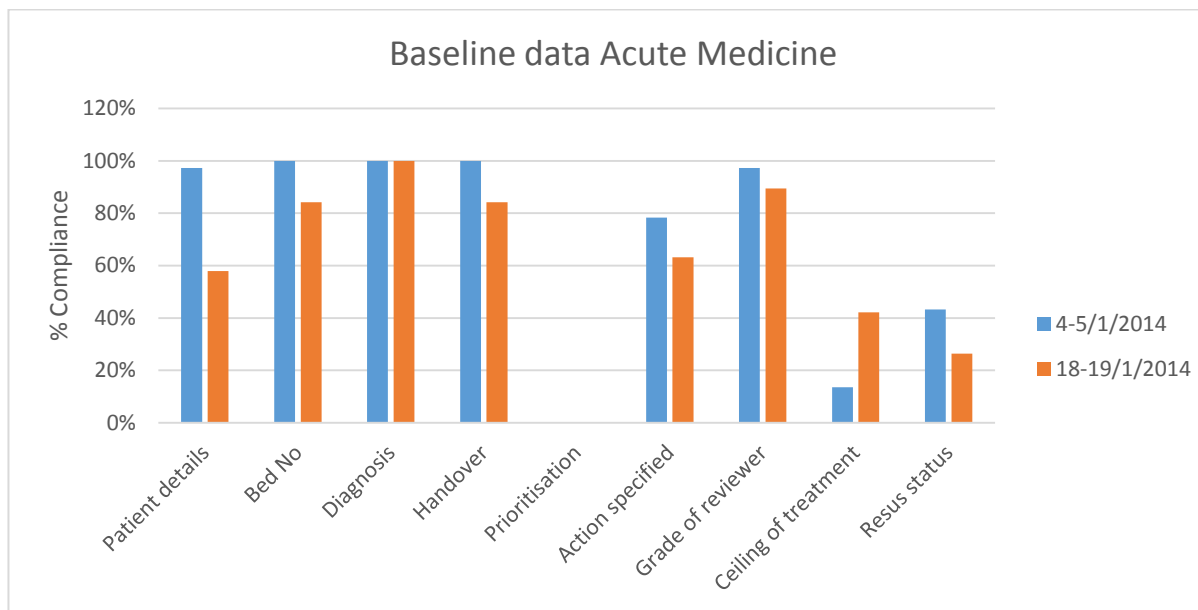













Supplementary information – run charts

Figure 9 Total number of patients handed over

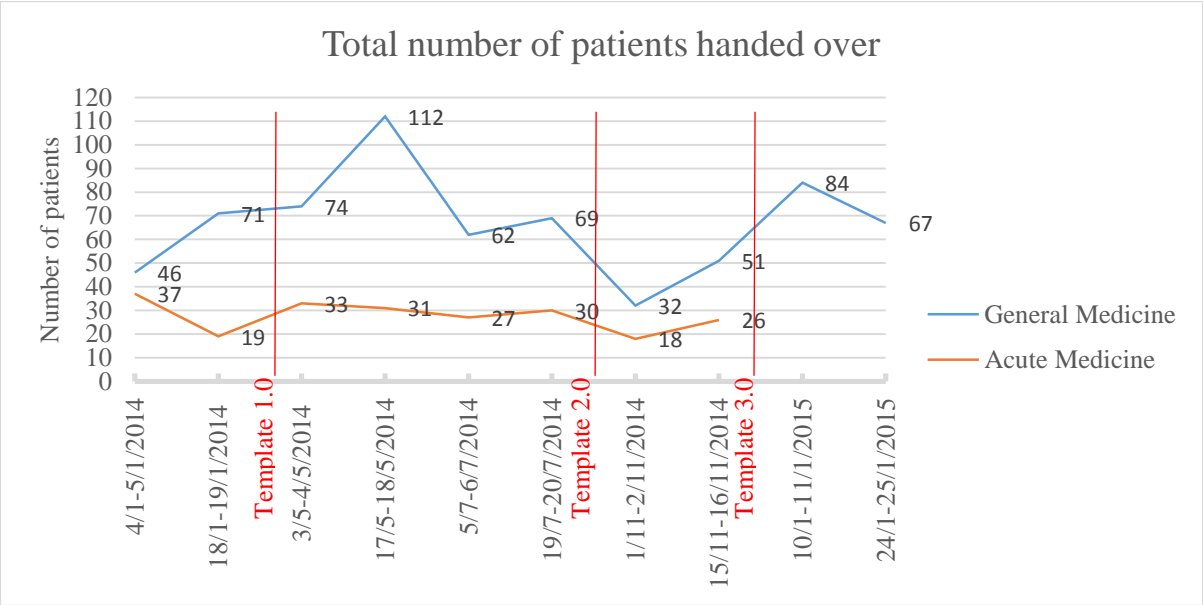

Figure 10 Compliance with documentation of patient's location (ward + bed number)

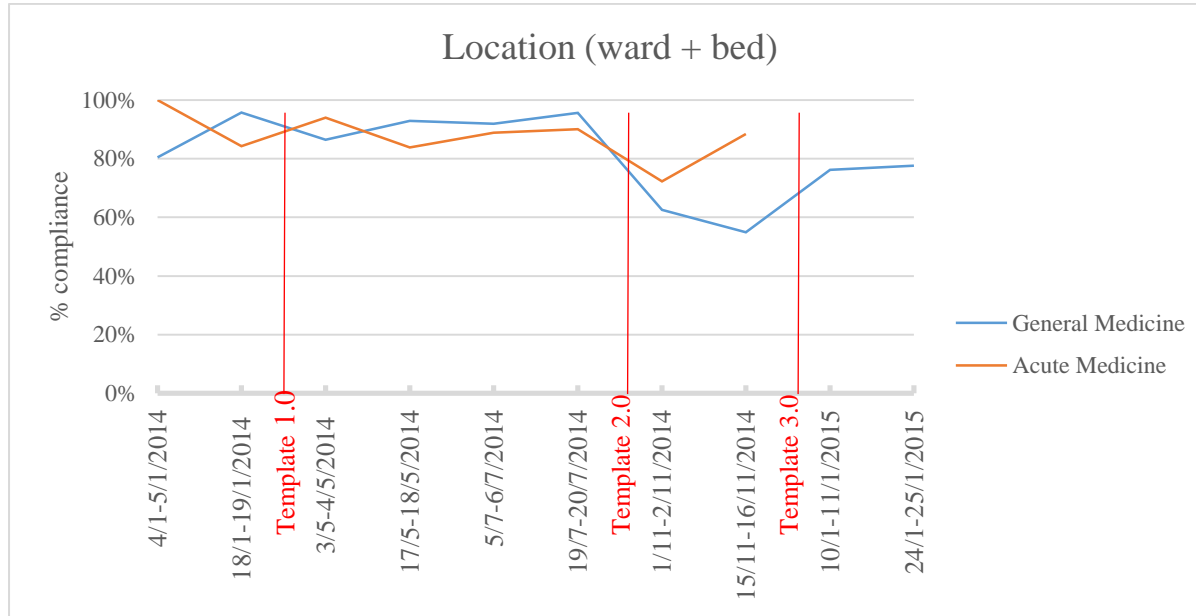

Figure 11 Compliance with documentation of three patient identifiers

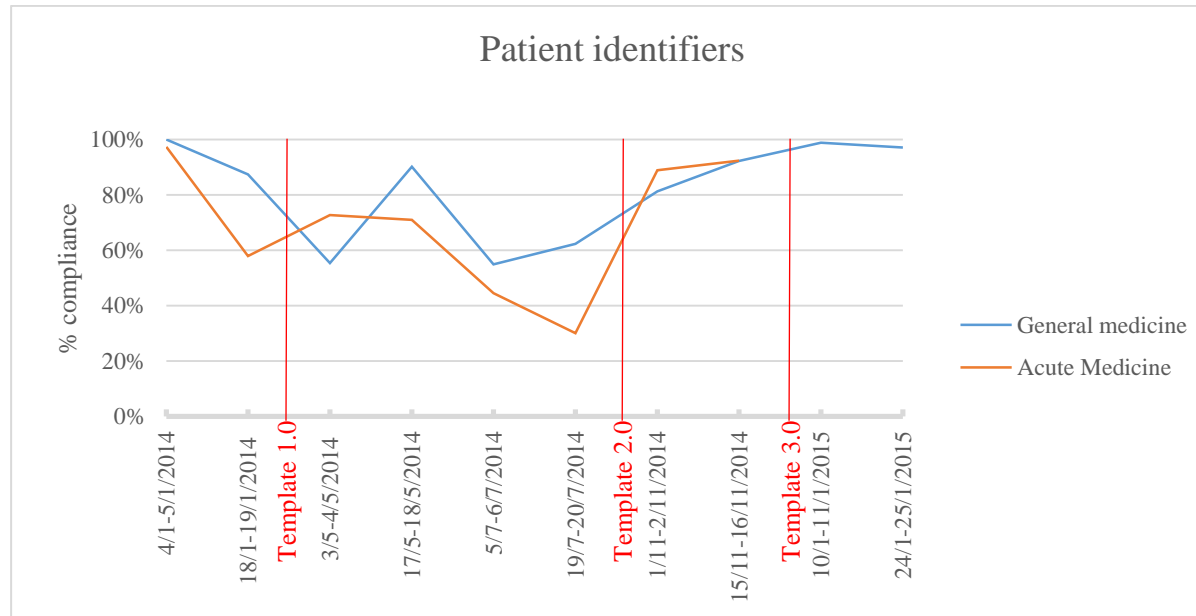

Figure 12 Compliance with documentation of working diagnosis

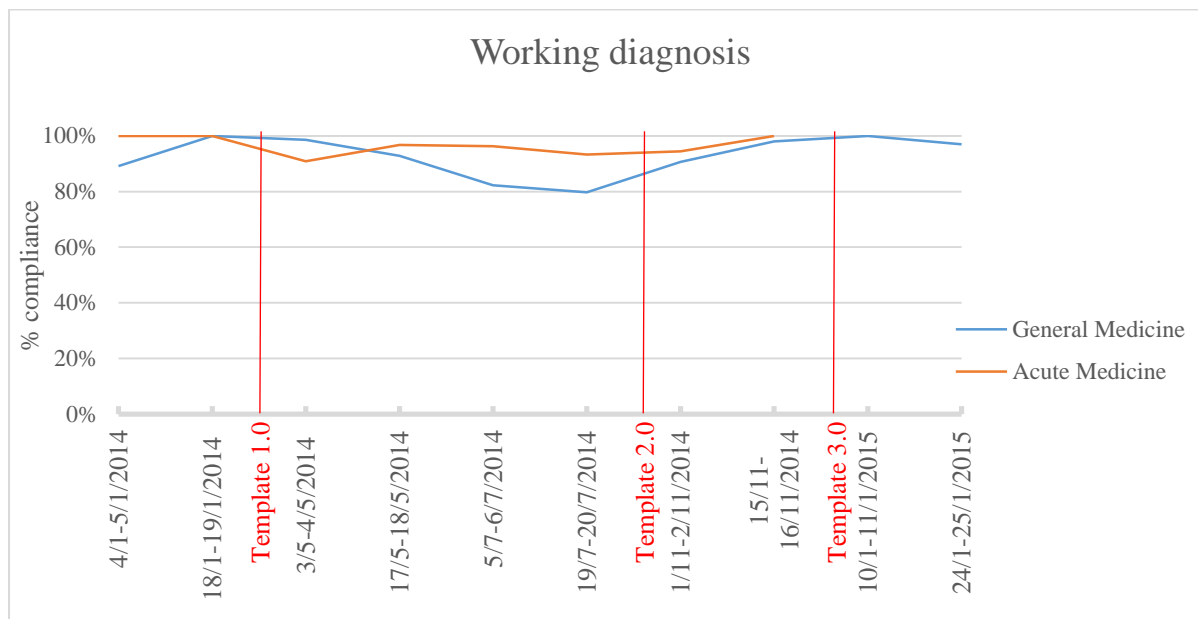

Figure 13 Compliance with documentation of suggested grade of reviewer

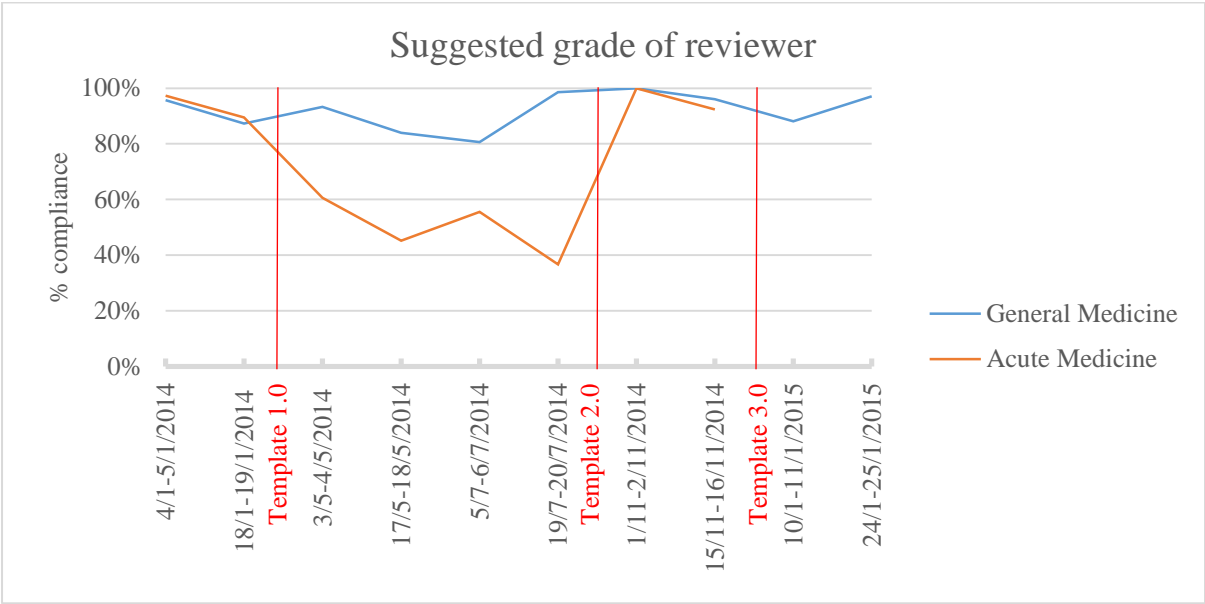

Figure 14 Compliance with documentation of ceiling of therapy

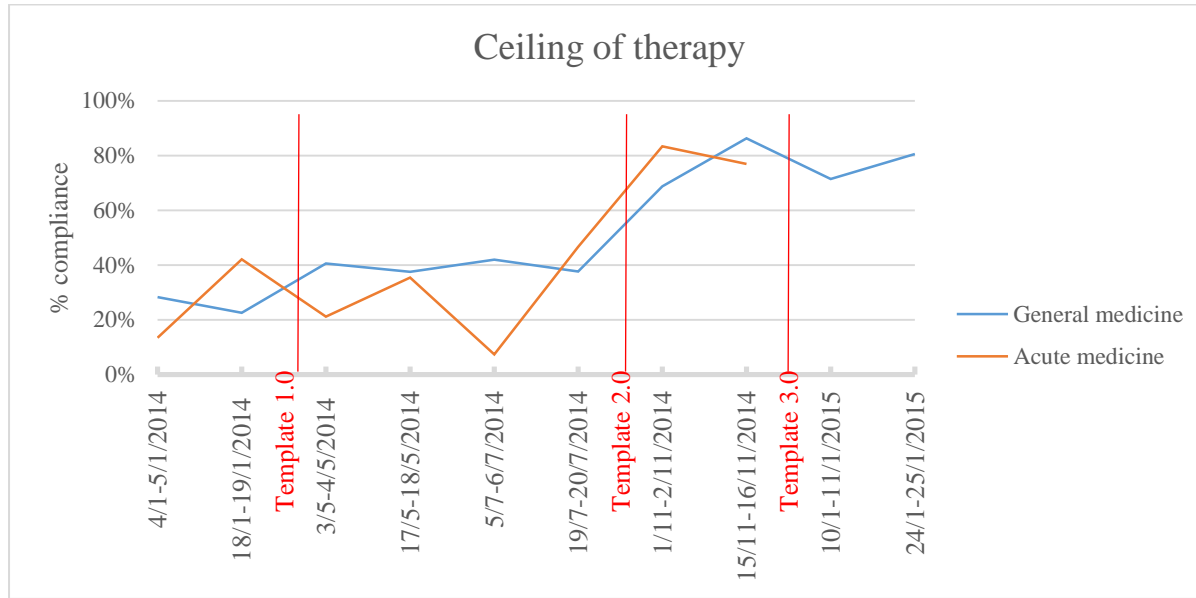

Figure 15 Compliance with documentation of resuscitation status

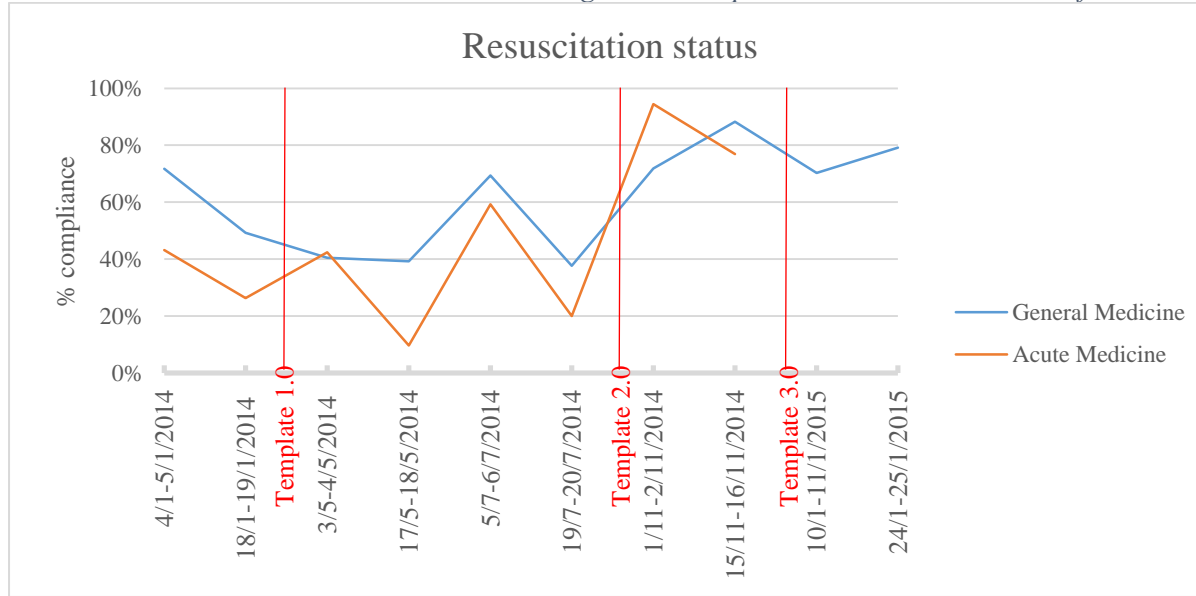

Figure 16 Compliance with documentation of reason for handover

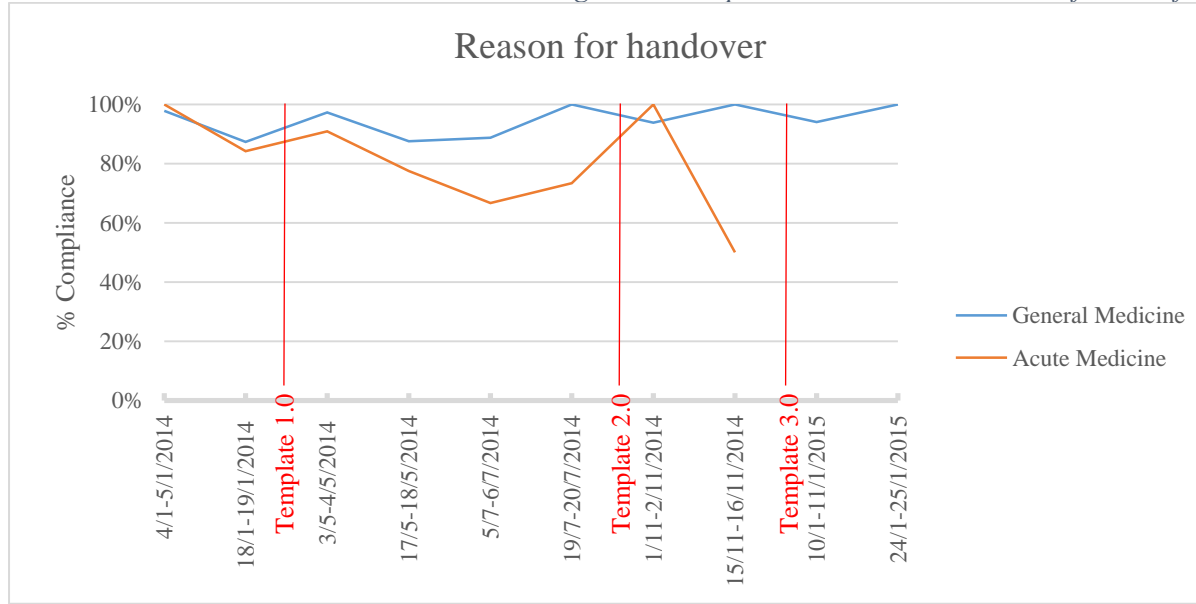



Figure 17 Compliance with documentation of suggested action (what if...?)

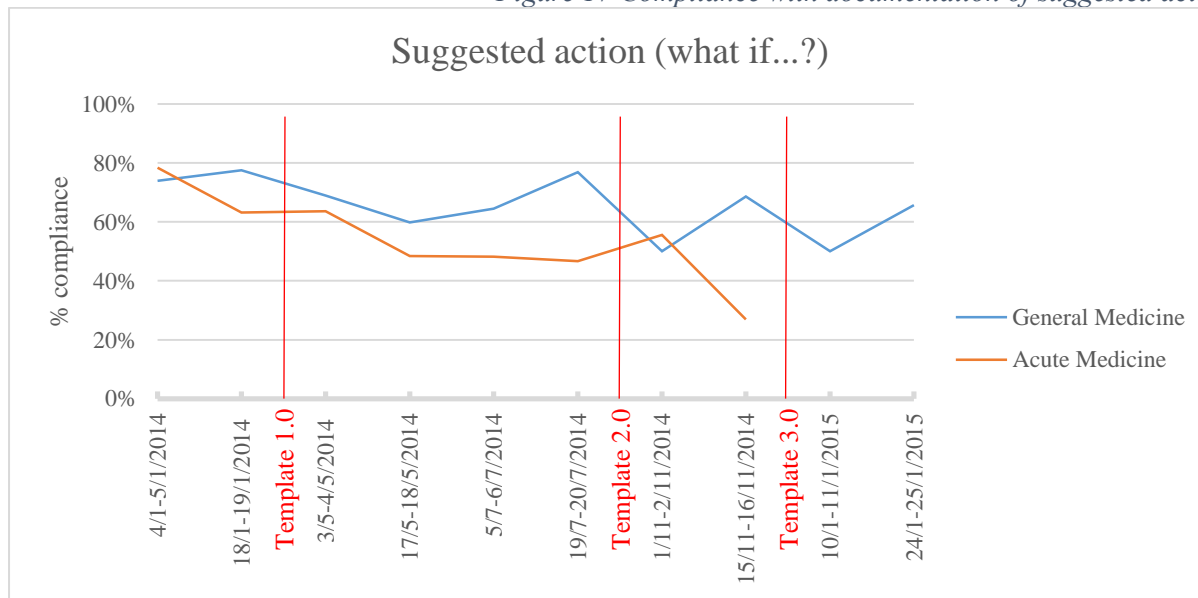

Figure 18 Compliance with traffic light prioritisation

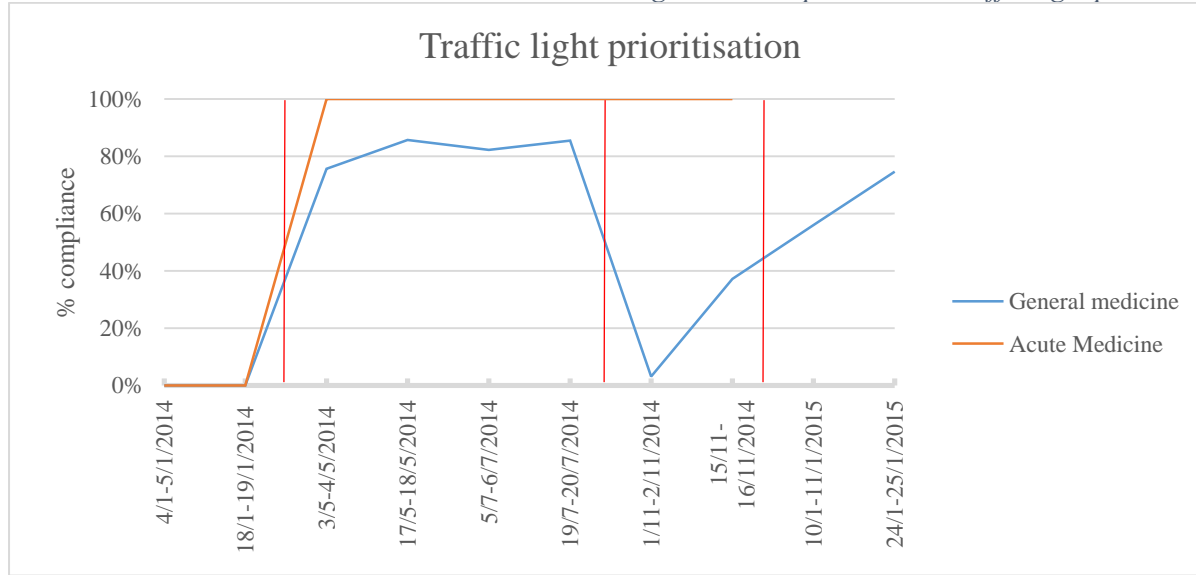

Supplement: bmjqir.u212152.w5721supp.pdf [file bmjqir.u212152.w5721supp.pdf]
